# Supplementary material
Source: Springer Nature journal article supplement (https://www.springermedizin.de/resource/supplementary/13034_2013_223_MOESM1_ESM.pdf/9652572)
Supplement: MOESM1 [file 9652572]

## Peer Victimization Scale

**These next questions ask you about bullying.**

| During this school year other kids <b><u>in school...</u></b>  | Not at<br><u>All</u> | <u>Once</u> | <u>2-3</u><br><u>Times</u> | <u>4 or More</u><br><u>Times</u> |
|----------------------------------------------------------------|----------------------|-------------|----------------------------|----------------------------------|
| a. called me names or swore at me.                             | 0                    | 1           | 2                          | 3                                |
| b. tried to get me into trouble with my friends.               | 0                    | 1           | 2                          | 3                                |
| c. took something without permission or stole things from me.  | 0                    | 1           | 2                          | 3                                |
| d. made fun of me for some reason.                             | 0                    | 1           | 2                          | 3                                |
| e. made me uncomfortable by standing too close or touching me. | 0                    | 1           | 2                          | 3                                |
| f. punched, kicked or beat me up.                              | 0                    | 1           | 2                          | 3                                |
| g. hurt me physically in some way.                             | 0                    | 1           | 2                          | 3                                |
| h. tried to break or damage something of mine.                 | 0                    | 1           | 2                          | 3                                |
| i. refused to talk to me or made other people not talk to me.  | 0                    | 1           | 2                          | 3                                |
